# Supplementary material for: Brain Age Gap as a Predictive Biomarker: Linking Aging, Lifestyle, and Neuropsychiatric Health
Source: Research Square preprint supplement (doi:10.21203/rs.3.rs-6283338/v1), 2025-04-16
Supplement: Supplementary file 1 [file ac02ab3afca93cc0e358e83c.docx]

**Supplementary Table**

**Supplementary Table 1. Baseline Cohort Characteristics and Neuroimaging Data in the UK Biobank Study Population**

| **Group** | **Baseline Participants** | **Baseline %** | **Total Scans** | **Scan %** |
| --- | --- | --- | --- | --- |
| Healthy Controls (CN) | 6036 | 15.5 | 6036 | 15.5 |
| Non-brain Disease | 25416 | 65.2 | 25416 | 65.2 |
| Brain Disorder | 7515 | 19.3 | 7515 | 19.3 |
| Total | 38967 | 100 | 38967 | 100 |

*UKB = UK Biobank; CN = Healthy Controls (no G00–G99/F00–F99/I60-I63 diagnoses); Non-brain Disease = Exclusively non-neurological comorbidities; Brain Disorder = Neurological/neuropsychiatric diagnoses (ICD-10 G00–G99, F00–F99, I60-I63); Scans represent baseline T1-weighted MRI acquisitions*

| **Supplementary Table 2. Distribution of Neurodegenerative, Psychiatric, and Neurological Disorders with Pathophysiological Classification in the Brain Disorder Group of UK Biobank Cohort (N=7,515)** | | | | |
| --- | --- | --- | --- | --- |
| **Disease Name** | **Abbreviation** | **ICD-10 Code** | **Number of Cases** | **Category** |
| Alzheimer's Disease | AD | G30 | 63 | Neurodegenerative Disorders |
| Vascular Dementia | VaD | F01 | 293 | Neurodegenerative Disorders |
| Parkinson's Disease | PD | G20 | 79 | Neurodegenerative Disorders |
| Stroke | - | I63 | 743 | Neurological Disorders |
| Anorexia Nervosa | AN | F50.0 | 48 | Psychiatric Disorders |
| Anxiety Disorder | ANX | F41 | 2390 | Psychiatric Disorders |
| Bipolar Disorder | BD | F31 | 72 | Psychiatric Disorders |
| Major Depressive Disorder | MDD | F32 | 4490 | Psychiatric Disorders |
| Epilepsy | - | G40 | 340 | Neurological Disorders |
| Multiple Sclerosis | MS | G35 | 151 | Neurological Disorders |
| Obsessive-Compulsive Disorder | OCD | F42 | 33 | Psychiatric Disorders |
| Post-Traumatic Stress Disorder | PTSD | F43.1 | 76 | Psychiatric Disorders |
| Schizophrenia | SCZ | F20 | 26 | Psychiatric Disorders |
| Sleep Disorders | SD | G47 | 679 | Neurological Disorders |

**Supplementary Table 3. Baseline Cohort Characteristics and Longitudinal Monitoring in the ADNI Study Population**

| **Group** | **Baseline Participants** | **Baseline %** | **Total Scans** | **Scan %** |
| --- | --- | --- | --- | --- |
| Cognitively Normal (CN) | 332 | 23.7 | 1,480 | 29.3 |
| Mild Cognitive Impairment (MCI) | 785 | 56.0 | 2,836 | 56.1 |
| Alzheimer's Disease (AD) | 285 | 20.3 | 742 | 14.7 |
| **Total** | **1,402** | **100** | **5,058** | **100** |

*ADNI = Alzheimer's Disease Neuroimaging Initiative; CN = Cognitively Normal; MCI = Mild Cognitive Impairment*

**Supplementary Table 4. Baseline Cohort Characteristics and Longitudinal Monitoring in the PPMI Study Population**

| **Group** | **Baseline Participants** | **Baseline %** | **Total Scans** | **Scan %** |
| --- | --- | --- | --- | --- |
| Healthy Controls (CN) | 185 | 15.7 | 279 | 9.6 |
| Prodromal Parkinson's (prodPD) | 381 | 32.2 | 1,326 | 45.6 |
| Parkinson's Disease (PD) | 616 | 52.1 | 1,303 | 44.8 |
| **Total** | **1,182** | **100** | **2,907** | **100** |

*PPMI = Parkinson's Progression Markers Initiative; HC = Healthy Controls; Scans include clinical assessments, biomarker collections and neuroimaging sessions*

**Supplementary Table 5. High-Resolution 3D Voxel Reconstruction via Transformer-Based Encoder with Multi-Head Attention and Optimized Learning Strategies**

| **Component** | **Parameters** |
| --- | --- |
| Input | 128³ voxels (16³ patches) |
| Encoder layers | 12 transformer blocks |
| Attention heads | 8-head multi-head attention |
| Hidden layers | MLP with 512→256 dimensions |
| Optimization | Adam (β₁=0.9, β₂=0.999) |
| Learning rate | 2×10⁻⁵ with cosine decay |
| Regularization | Early stopping (10 &epochs patience) |

**Supplementary Table 6. Performance of the 3D-ViT Model in Brain Age Estimation Across Cohorts and Subgroups**

| **Group** | **N** | **MAE (years)** | **MSE (years)** | **R2** | **Pearson r** |
| --- | --- | --- | --- | --- | --- |
| **Healthy Control Group Performance** |  |  |  |  |  |
| UKB Training | 25,162 | 2.627 | 10.988 | 0.81 | 0.901 |
| UKB Cross-validation (Mean) | 5,032 | 2.61 | 10.999 | 0.808 | 0.899 |
| UKB Testing | 6,290 | 2.684 | 11.398 | 0.805 | 0.898 |
| **Subgroup Analysis** |  |  |  |  |  |
| UKB Female | 16,159 | 2.567 | 10.456 | 0.811 | 0.902 |
| UKB Male | 15,293 | 2.714 | 11.719 | 0.804 | 0.897 |
| UKB Age < 65 | 15,211 | 2.609 | 10.867 | 0.455 | 0.76 |
| UKB Age >=65 | 16,241 | 2.666 | 11.261 | 0.233 | 0.687 |
| **External Validation** |  |  |  |  |  |
| ADNI, CN | 1,480 | 2.998 | 16 | 0.568 | 0.758 |
| PPMI, CN | 279 | 3.205 | 17.64 | 0.858 | 0.936 |
| **Disease Group Performance** |  |  |  |  |  |
| UKB Patient Group | 7,515 | 2.773 | 12.566 | 0.793 | 0.895 |
| ADNI, MCI | 2,836 | 4.773 | 36.26 | 0.37 | 0.675 |
| ADNI, AD | 742 | 6.08 | 57.55 | 0.068 | 0.51 |
| PPMI, ProdPD | 1,326 | 3.913 | 23.97 | 0.601 | 0.854 |
| PPMI, PD | 1,302 | 3.483 | 19.64 | 0.778 | 0.96 |

**Supplementary Table 7. Descriptive Statistics of Neuropsychological Tests by Cognitive Domain**

| **Cognitive Domain** | **Test Name** | **Sample Size** | **Age Mean (SD)** | **Sex (% Female)** |
| --- | --- | --- | --- | --- |
| Short-term memory | Numeric Memory Test (NMT) | 25,617 | 64.48 (7.56) | 52.30% |
| Visual reasoning | Matrix Pattern Completion (MPC) | 24,872 | 64.51 (7.49) | 52.15% |
| Abstract reasoning | Fluid Intelligence Test (FIT) | 24,901 | 64.53 (7.48) | 52.10% |
| Processing speed | Reaction Time Test (RTT) | 25,617 | 64.48 (7.56) | 52.30% |
| Associative learning | Paired Associate Learning (PAL) | 24,872 | 64.50 (7.51) | 52.20% |
| Executive function | Tower Rearranging (TR) | 24,945 | 64.49 (7.50) | 52.20% |
| Cognitive flexibility | Symbol Digit Substitution (SDS) | 25,617 | 64.48 (7.56) | 52.30% |
| Visual memory | Pairs Matching Test (PMT) | 25,617 | 64.48 (7.56) | 52.30% |

**Supplementary Table 8. Cognitive Performance Stratified by Brain Age Gap Quartiles in the UKB Cohort**

| **Variables (Mean ± SD)** | **Total (n = 25617)** | **Q1 (n = 6408)** | **Q2 (n = 6834)** | **Q3 (n = 6750)** | **Q4 (n = 5625)** | **Statistic** | **P** |
| --- | --- | --- | --- | --- | --- | --- | --- |
| Numeric memory | 6.79 ± 1.25 | 6.80 ± 1.26 | 6.78 ± 1.26 | 6.78 ± 1.24 | 6.77 ± 1.25 | F=0.52 | 0.671 |
| Matrix pattern completion | 8.03 ± 2.10 | 8.10 ± 2.10 | 8.12 ± 2.07 | 7.95 ± 2.11 | 7.95 ± 2.12 | F=12.40 | **<0.001** |
| Fluid intelligence | 6.59 ± 2.01 | 6.57 ± 2.03 | 6.64 ± 2.01 | 6.57 ± 1.99 | 6.57 ± 2.02 | F=1.93 | 0.122 |
| Reaction time/ms | 597.52 ± 109.30 | 591.74 ± 106.26 | 593.68 ± 109.47 | 599.79 ± 108.11 | 604.88 ± 112.78 | F=19.27 | **<0.001** |
| Paired associate learning | 7.03 ± 2.51 | 7.14 ± 2.52 | 7.15 ± 2.47 | 6.99 ± 2.51 | 6.85 ± 2.52 | F=19.82 | **<0.001** |
| Tower rearranging | 9.96 ± 3.20 | 9.99 ± 3.22 | 10.07 ± 3.17 | 9.86 ± 3.22 | 9.91 ± 3.20 | F=5.20 | **0.001** |
| Symbol digit substitution | 18.95 ± 5.22 | 19.29 ± 5.15 | 19.30 ± 5.17 | 18.77 ± 5.31 | 18.45 ± 5.21 | F=40.67 | **<0.001** |
| Pairs Matching | 2.52 ± 1.38 | 2.51 ± 1.35 | 2.46 ± 1.34 | 2.53 ± 1.39 | 2.57 ± 1.44 | F=6.68 | **<0.001** |

**Supplementary Table 9. Associations Between Biological Aging Quartiles and Cognitive Performance Across Multiple Domains (UK Biobank Cohort)**

| Cognitive Domain | Comparison | Beta | 95% CI | P value | PFDR | Significance |
| --- | --- | --- | --- | --- | --- | --- |
| Numeric memory | Q2 vs Q1 | -0.02 | -0.06 to 0.03 | 0.43896 | 0.43896 |  |
| Q3 vs Q1 | -0.02 | -0.06 to 0.03 | 0.40904 | 0.43896 |  |
| Q4 vs Q1 | -0.03 | -0.07 to 0.02 | 0.2253 | 0.43896 |  |
| Matrix pattern completion | Q2 vs Q1 | 0.02 | -0.05 to 0.09 | 0.5784 | 0.5784 |  |
| Q3 vs Q1 | -0.15 | -0.22 to -0.08 | <0.001 | <0.001 | *** |
| Q4 vs Q1 | -0.15 | -0.22 to -0.08 | <0.001 | <0.001 | *** |
| Fluid intelligence | Q2 vs Q1 | 0.07 | 0.00 to 0.14 | 0.04872 | 0.14615 |  |
| Q3 vs Q1 | 0 | -0.07 to 0.07 | 0.89522 | 0.92806 |  |
| Q4 vs Q1 | 0 | -0.07 to 0.07 | 0.92806 | 0.92806 |  |
| Reaction time | Q2 vs Q1 | 1.94 | -1.84 to 5.73 | 0.31355 | 0.31355 |  |
| Q3 vs Q1 | 8.06 | 4.28 to 11.84 | <0.001 | <0.001 | *** |
| Q4 vs Q1 | 13.15 | 9.37 to 16.93 | <0.001 | <0.001 | *** |
| Paired associate learning | Q2 vs Q1 | 0.01 | -0.07 to 0.10 | 0.75344 | 0.75344 |  |
| Q3 vs Q1 | -0.14 | -0.23 to -0.06 | 0.00124 | 0.00186 | ** |
| Q4 vs Q1 | -0.28 | -0.37 to -0.20 | <0.001 | <0.001 | *** |
| Tower rearranging | Q2 vs Q1 | 0.08 | -0.03 to 0.19 | 0.16328 | 0.16586 |  |
| Q3 vs Q1 | -0.13 | -0.24 to -0.02 | 0.02211 | 0.06633 |  |
| Q4 vs Q1 | -0.08 | -0.19 to 0.03 | 0.16586 | 0.16586 |  |
| Symbol digit substitution | Q2 vs Q1 | 0.01 | -0.17 to 0.19 | 0.93782 | 0.93782 |  |
| Q3 vs Q1 | -0.52 | -0.70 to -0.34 | <0.001 | <0.001 | *** |
| Q4 vs Q1 | -0.84 | -1.02 to -0.66 | <0.001 | <0.001 | *** |
| Pairs Matching | Q2 vs Q1 | -0.05 | -0.09 to 0.00 | 0.05414 | 0.08121 |  |
| Q3 vs Q1 | 0.02 | -0.03 to 0.07 | 0.43507 | 0.43507 |  |
| Q4 vs Q1 | 0.06 | 0.01 to 0.11 | 0.01319 | 0.03956 | * |

*Linear regression models were used to assess the associations between biological aging quartiles (independent variable, with Q1 as the reference group) and cognitive domain measures (dependent variables). β coefficients with 95% confidence intervals (CIs) were estimated using ordinary least squares. To account for multiple comparisons across eight cognitive domains, we applied the Benjamini-Hochberg procedure to control the false discovery rate (FDR). Significance thresholds were defined as: P < 0.001***, P < 0.01**, and P< 0.05*.*

**Supplementary Table 10. Optimal Knots, Inflection Points, and Maximum Effects of Brain Age Gap on Cognitive Domains**

| **Cognitive Domain** | **Optimal Knots** | **Inflection Point** | **Max Effect** |
| --- | --- | --- | --- |
| Numeric Memory | 1 | -0.06 | 3.17 |
| Matrix Pattern Completion | 1 | 0.1 | 3.29 |
| Fluid Intelligence | 1 | 0.01 | 3.46 |
| Reaction Time | 1 | -1.75 | 3.13 |
| Paired Associate Learning | 1 | 0.01 | 3.11 |
| Tower Rearranging | 1 | -0.03 | 3.24 |
| Symbol Digit Substitution | 1 | 0.1 | 3.21 |
| Pairs Matching | 1 | 0.1 | 3.26 |

**Supplementary Table 11. Cohort Characteristics and Follow-up Duration Stratified by BAG Quartiles in the UKB Dataset**

| **Disorder Category** | **BAG Quartile** | **Cohort Size, n** | **Incident Cases, n** | **Censored Cases, n** | **Follow-up Duration, years**  **Mean (SD)** | **Person-Years**  **median [min-max]** |
| --- | --- | --- | --- | --- | --- | --- |
| **Alzheimer's Disease** | Q1 | 9,529 | 11 | 9,518 | 9.04 | 9.96 [0.03-26.75] |
| Q2 | 10,265 | 6 | 10,259 | 9.07 | 10.00 [0-26.70] |
| Q3 | 10,268 | 17 | 10,251 | 8.97 | 9.88 [0-26.32] |
| Q4 | 8,905 | 29 | 8,876 | 9.05 | 9.93 [0.01-26.97] |
|  | **Total** | **38,967** | **63** | **38,904** | **9.03** | **9.94 [0-26.97]** |
| **Vascular Dementia** | Q1 | 9,529 | 64 | 9,465 | 9.04 | 9.96 [0.03-26.75] |
| Q2 | 10,265 | 82 | 10,183 | 9.07 | 10.00 [0-26.70] |
| Q3 | 10,268 | 68 | 10,200 | 8.98 | 9.88 [0-26.32] |
| Q4 | 8,905 | 79 | 8,826 | 9.05 | 9.93 [0.01-26.97] |
|  | **Total** | **38,967** | **293** | **38,674** | **9.03** | **9.94 [0-26.97]** |
| **Parkinson's Disease** | Q1 | 9,529 | 14 | 9,515 | 9.03 | 9.96 [0.03-26.75] |
| Q2 | 10,265 | 18 | 10,247 | 9.06 | 10.00 [0-26.70] |
| Q3 | 10,268 | 23 | 10,245 | 8.97 | 9.87 [0-26.32] |
| Q4 | 8,905 | 24 | 8,881 | 9.05 | 9.92 [0.01-26.97] |
|  | **Total** | **38,967** | **79** | **38,888** | **9.03** | **9.94 [0-26.97]** |
| **Stroke** | Q1 | 9,529 | 166 | 9,363 | 9.01 | 9.93 [0.03-26.75] |
| Q2 | 10,265 | 153 | 10,112 | 9.04 | 9.98 [0-26.70] |
| Q3 | 10,268 | 198 | 10,070 | 8.95 | 9.83 [0-26.32] |
| Q4 | 8,905 | 226 | 8,679 | 9.01 | 9.86 [0.01-26.97] |
|  | **Total** | **38,967** | **743** | **38,224** | **9.00** | **9.90 [0-26.97]** |
| **Anorexia Nervosa** | Q1 | 9,529 | 11 | 9,518 | 9.04 | 9.97 [0.03-26.75] |
| Q2 | 10,265 | 9 | 10,256 | 9.07 | 10.00 [0-26.70] |
| Q3 | 10,268 | 14 | 10,254 | 8.98 | 9.88 [0-26.32] |
| Q4 | 8,905 | 14 | 8,891 | 9.05 | 9.93 [0.01-26.97] |
|  | **Total** | **38,967** | **48** | **38,919** | **9.03** | **9.94 [0-26.97]** |
| **Anxiety Disorder** | Q1 | 9,529 | 472 | 9,057 | 8.97 | 9.86 [0.03-26.75] |
| Q2 | 10,265 | 588 | 9,677 | 8.99 | 9.91 [0-26.70] |
| Q3 | 10,268 | 697 | 9,571 | 8.88 | 9.74 [0-26.32] |
| Q4 | 8,905 | 633 | 8,272 | 8.93 | 9.74 [0.01-26.97] |
|  | **Total** | **38,967** | **2,390** | **36,577** | **8.94** | **9.81 [0-26.97]** |
| **Bipolar Disorder** | Q1 | 9,529 | 11 | 9,518 | 9.03 | 9.96 [0.03-26.75] |
| Q2 | 10,265 | 10 | 10,255 | 9.07 | 10.00 [0-26.70] |
| Q3 | 10,268 | 26 | 10,242 | 8.97 | 9.87 [0-26.32] |
| Q4 | 8,905 | 25 | 8,880 | 9.04 | 9.91 [0.01-26.97] |
|  | **Total** | **38,967** | **72** | **38,895** | **9.03** | **9.94 [0-26.97]** |
| **Depression** | Q1 | 9,529 | 905 | 8,624 | 8.94 | 9.84 [0.03-26.75] |
| Q2 | 10,265 | 1,126 | 9,139 | 8.93 | 9.86 [0-26.70] |
| Q3 | 10,268 | 1,235 | 9,033 | 8.82 | 9.69 [0-26.32] |
| Q4 | 8,905 | 1,224 | 7,681 | 8.85 | 9.68 [0.01-26.97] |
|  | **Total** | **38,967** | **4,490** | **34,477** | **8.88** | **9.77 [0-26.97]** |
| **Epilepsy** | Q1 | 9,529 | 57 | 9,472 | 9.03 | 9.96 [0.03-26.75] |
| Q2 | 10,265 | 84 | 10,181 | 9.05 | 9.99 [0-26.70] |
| Q3 | 10,268 | 82 | 10,186 | 8.96 | 9.87 [0-26.32] |
| Q4 | 8,905 | 117 | 8,788 | 9.03 | 9.90 [0.01-26.97] |
|  | **Total** | **38,967** | **340** | **38,627** | **9.02** | **9.93 [0-26.97]** |
| **Multiple Sclerosis** | Q1 | 9,529 | 14 | 9,515 | 9.04 | 9.97 [0.03-26.75] |
| Q2 | 10,265 | 20 | 10,245 | 9.07 | 10.00 [0-26.70] |
| Q3 | 10,268 | 33 | 10,235 | 8.97 | 9.87 [0-26.32] |
| Q4 | 8,905 | 84 | 8,821 | 9.04 | 9.91 [0.01-26.97] |
|  | **Total** | **38,967** | **151** | **38,816** | **9.03** | **9.94 [0-26.97]** |
| **Obsessive-Compulsive Disorder** | Q1 | 9,529 | 5 | 9,524 | 9.04 | 9.96 [0.03-26.75] |
| Q2 | 10,265 | 8 | 10,257 | 9.07 | 10.00 [0-26.70] |
| Q3 | 10,268 | 10 | 10,258 | 8.97 | 9.87 [0-26.32] |
| Q4 | 8,905 | 10 | 8,895 | 9.05 | 9.93 [0.01-26.97] |
|  | **Total** | **38,967** | **33** | **38,934** | **9.03** | **9.94 [0-26.97]** |
| **Post-Traumatic Stress Disorder** | Q1 | 9,529 | 15 | 9,514 | 9.04 | 9.96 [0.03-26.75] |
| Q2 | 10,265 | 20 | 10,245 | 9.07 | 10.00 [0-26.70] |
| Q3 | 10,268 | 26 | 10,242 | 8.97 | 9.87 [0-26.32] |
| Q4 | 8,905 | 15 | 8,890 | 9.05 | 9.93 [0.01-26.97] |
|  | **Total** | **38,967** | **76** | **38,891** | **9.03** | **9.94 [0-26.97]** |
| **Schizophrenia** | Q1 | 9,529 | 2 | 9,527 | 9.04 | 9.97 [0.03-26.75] |
| Q2 | 10,265 | 6 | 10,259 | 9.07 | 10.00 [0-26.70] |
| Q3 | 10,268 | 4 | 10,264 | 8.98 | 9.88 [0-26.32] |
| Q4 | 8,905 | 14 | 8,891 | 9.05 | 9.92 [0.01-26.97] |
|  | **Total** | **38,967** | **26** | **38,941** | **9.03** | **9.94 [0-26.97]** |
| **Sleep Disorder** | Q1 | 9,529 | 134 | 9,395 | 9.01 | 9.92 [0.03-26.75] |
| Q2 | 10,265 | 159 | 10,106 | 9.04 | 9.97 [0-26.70] |
| Q3 | 10,268 | 184 | 10,084 | 8.94 | 9.83 [0-26.32] |
| Q4 | 8,905 | 202 | 8,703 | 9.01 | 9.88 [0.01-26.97] |
|  | **Total** | **38,967** | **679** | **38,288** | **9.00** | **9.90 [0-26.97]** |

**Supplementary Table 12. Cohort Characteristics and Follow-up Duration Stratified by BAG Quartiles in the ADNI Dataset**

| **Disorder Category** | **BAG Quartile** | **Cohort Size, n** | **Incident Cases, n** | **Censored Cases, n** | **Follow-up Duration, years**  **Mean (SD)** | **Person-Years**  **median [min-max]** |
| --- | --- | --- | --- | --- | --- | --- |
| **Mild Cognitive Impairment** | Q1 | 1,156 | 611 | 545 | 3.04 | 2 [0-10.5] |
| Q2 | 865 | 404 | 461 | 2.79 | 2 [0-10] |
| Q3 | 941 | 471 | 470 | 2.48 | 2 [0-8] |
| Q4 | 2,096 | 1350 | 746 | 1.91 | 2 [0-10] |
|  | **Total** | **5,058** | **2,836** | **2,222** | **2.44** | **2** [0-10.5] |
| **Alzheimer's Disease** | Q1 | 1,156 | 161 | 995 | 3.04 | 2 [0-10.5] |
| Q2 | 865 | 75 | 790 | 2.79 | 2 [0-10] |
| Q3 | 941 | 106 | 835 | 2.48 | 2 [0-8] |
| Q4 | 2,096 | 400 | 1,696 | 1.91 | 2 [0-10] |
|  | **Total** | **5,058** | **742** | **4,316** | **2.44** | 2 [0-10.5] |

**Supplementary Table 13. Cohort Characteristics and Follow-up Duration Stratified by BAG Quartiles in the PPMI Dataset**

| **Disorder Category** | **BAG Quartile** | **Cohort Size, n** | **Incident Cases, n** | **Censored Cases, n** | **Follow-up Duration, years** | **Person-Years** |
| --- | --- | --- | --- | --- | --- | --- |
| **Mean (SD)** | **median [min-max]** |
| **Prodromal Parkinson's** | Q1 | 727 | 400 | 327 | 2.59 | 2 [1-2] |
| Q2 | 725 | 344 | 381 | 2.51 | 2 [1-2] |
| Q3 | 728 | 300 | 428 | 2.43 | 2 [1-2] |
| Q4 | 727 | 282 | 445 | 2.46 | 2 [1-2] |
| **Total** | **2,907** | **1,326** | **1,581** | **2.50** | 2 [1-2] |
| **Parkinson's Disease** | Q1 | 727 | 278 | 449 | 2.59 | 2 [1-2] |
| Q2 | 725 | 305 | 420 | 2.51 | 2 [1-2] |
| Q3 | 728 | 347 | 381 | 2.43 | 2 [1-2] |
| Q4 | 727 | 372 | 355 | 2.46 | 2 [1-2] |
|  | **Total** | **2,907** | **1,302** | **1,605** | **2.50** | 2 [1-2] |

**Supplementary Table 14. Comparison of BAG Levels Across Various Disease Groups Compared to Healthy Controls (CN)**

|  |  | **BAG** |  |
| --- | --- | --- | --- |
| **Disease Group** | **Sample Size** | **Mean ± SD** | **P-value** |
| CN | 9,274 | 0.122 ± 3.039 | **Reference** |
| AD | 805 | 3.242 ± 6.635 | **<0.001***** |
| MCI | 2,836 | 2.063 ± 5.619 | **<0.001***** |
| VaD | 293 | 0.279 ± 3.463 | 0.442 |
| ProdPD | 1,326 | -1.441 ± 4.880 | **<0.001***** |
| PD | 1,381 | -0.003 ± 4.463 | 0.321 |
| Stroke | 743 | 0.631 ± 3.585 | **<0.001***** |
| AN | 48 | 0.369 ± 3.547 | 0.631 |
| ANX | 2,390 | 0.525 ± 3.425 | **<0.001***** |
| BD | 72 | 1.913 ± 4.051 | **<0.001***** |
| MDD | 4,490 | 0.516 ± 3.409 | **<0.001***** |
| Epilepsy | 340 | 1.059 ± 3.478 | **<0.001***** |
| MS | 151 | 4.069 ± 5.328 | **<0.001***** |
| OCD | 33 | 1.161 ± 3.231 | 0.074 |
| PTSD | 76 | 0.310 ± 3.539 | 0.645 |
| SCZ | 26 | 2.068 ± 3.341 | **0.007**** |
| SD | 679 | 0.641 ± 3.379 | **<0.001***** |

*Data presented as mean ± standard deviation.* ***P-values calculated using two-sample t-test compared to CN group.***

**Supplementary Table 15. Association of Biological Aging (BAG) with Neurological and Psychiatric Disorders: Hazard Ratios (HR) and 95% Confidence Intervals (CI) Stratified by BAG Quartiles**

| **Disease** | **BAG** | **HR [95% CI]** | **FDR P-value** |
| --- | --- | --- | --- |
| **Alzheimers disease** | **BAG per year** | **1.165 [1.086-1.249]** | **7.368e-05***** |
| Q2 vs Q1 | 0.496 [0.183-1.340] | 0.278 |
| Q3 vs Q1 | 1.450 [0.679-3.095] | 0.469 |
| **Q4 vs Q1** | **2.801 [1.399-5.608]** | **0.011*** |
| **Mild cognitive impairment** | **BAG per year** | **1.040 [1.030-1.050]** | **3.201e-04***** |
| Q2 vs Q1 | 0.956 [0.856-1.067] | 0.421 |
| **Q3 vs Q1** | **1.449 [1.307-1.607]** | **2.206e-04***** |
| **Q4 vs Q1** | **1.691[1.526-1.874]** | **5.606e-05***** |
| **Vascular dementia** | BAG per year | 1.022 [0.988-1.058] | 0.323 |
| Q2 vs Q1 | 1.169 [0.843-1.621] | 0.476 |
| Q3 vs Q1 | 0.990 [0.704-1.393] | 0.969 |
| Q4 vs Q1 | 1.311 [0.943-1.823] | 0.202 |
|  | BAG per year | 0.993 [0.992-1.001] | 0.199 |
| **Prodromal Parkinson’s** | Q2 vs Q1 | 0.903 [0.811-0.994] | 0.056 |
|  | Q3 vs Q1 | 1.112 [0.991-1.245] | 0.076 |
|  | Q4 vs Q1 | 0.925 [0.833-1.023] | 0.105 |
|  | BAG per year | 1.038 [0.972-1.108] | 0.385 |
| **Parkinsons disease** | Q2 vs Q1 | 1.176 [0.585-2.365] | 0.716 |
|  | Q3 vs Q1 | 1.532 [0.788-2.977] | 0.325 |
|  | Q4 vs Q1 | 1.830 [0.947-3.538] | 0.154 |
|  | **BAG per year** | **1.055 [1.033-1.077]** | **4.447e-06***** |
| **Stroke** | Q2 vs Q1 | 0.843 [0.677-1.050] | 0.234 |
|  | Q3 vs Q1 | 1.114 [0.907-1.369] | 0.433 |
|  | **Q4 vs Q1** | **1.456 [1.191-1.779]** | **9.012e-04***** |
|  | BAG per year | 1.030 [0.947-1.120] | 0.580 |
| **Anorexia nervosa** | Q2 vs Q1 | 0.733 [0.304-1.769] | 0.580 |
|  | Q3 vs Q1 | 1.183 [0.537-2.605] | 0.735 |
|  | Q4 vs Q1 | 1.335 [0.606-2.941] | 0.580 |
|  | BAG per year | 1.046 [1.034-1.058] | **1.630e-12***** |
| **Anxiety disorder** | Q2 vs Q1 | 1.141 [1.011-1.288] | 0.077 |
|  | Q3 vs Q1 | 1.385 [1.233-1.557] | **3.221e-07***** |
|  | Q4 vs Q1 | 1.442 [1.280-1.625] | **1.820e-08***** |
|  | BAG per year | 1.174 [1.100-1.253] | **7.383e-06***** |
| **Bipolar disorder** | Q2 vs Q1 | 0.840 [0.357-1.977] | 0.735 |
|  | Q3 vs Q1 | 2.207 [1.09-4.466] | 0.070 |
|  | **Q4 vs Q1** | **2.431 [1.196-4.941]** | **0.038*** |
|  | **BAG per year** | **1.046 [1.037-1.055]** | **5.046e-23***** |
| **Depression** | **Q2 vs Q1** | **1.147 [1.051-1.252]** | **0.007**** |
|  | **Q3 vs Q1** | **1.286 [1.180-1.401]** | **8.535e-08***** |
|  | **Q4 vs Q1** | **1.466 [1.345-1.598]** | **5.686e-17***** |
|  | **BAG per year** | **1.094 [1.061-1.128]** | **1.023e-07***** |
| **Epilepsy** | Q2 vs Q1 | 1.350 [0.964-1.889] | 0.166 |
|  | Q3 vs Q1 | 1.345 [0.960-1.886] | 0.171 |
|  | **Q4 vs Q1** | **2.189 [1.595-3.005]** | **6.561e-06***** |
|  | **BAG per year** | **1.363 [1.312-1.416]** | **5.096e-55***** |
| **Multiple sclerosis** | Q2 vs Q1 | 1.308 [0.660-2.589] | 0.580 |
|  | **Q3 vs Q1** | **2.209 [1.182-4.128]** | **0.036*** |
|  | **Q4 vs Q1** | **6.417 [3.644-11.299]** | **1.536e-09***** |
|  | BAG per year | 1.103 [0.999-1.218] | 0.117 |
| **Obsessive compulsive disorder** | Q2 vs Q1 | 1.449 [0.474-4.429] | 0.600 |
|  | Q3 vs Q1 | 1.868 [0.638-5.464] | 0.378 |
|  | Q4 vs Q1 | 2.123 [0.726-6.212] | 0.278 |
|  | BAG per year | 1.025 [0.959-1.096] | 0.580 |
| **Post traumatic stress disorder** | Q2 vs Q1 | 1.227 [0.628-2.397] | 0.616 |
|  | Q3 vs Q1 | 1.621 [0.859-3.060] | 0.242 |
|  | Q4 vs Q1 | 1.069 [0.522-2.186] | 0.898 |
|  | **BAG per year** | **1.189 [1.067-1.324]** | **0.006**** |
| **Schizophrenia** | Q2 vs Q1 | 2.755 [0.556-13.649] | 0.327 |
|  | Q3 vs Q1 | 1.868 [0.342-10.198] | 0.580 |
|  | **Q4 vs Q1** | **7.504 [1.705-33.018]** | **0.022*** |
|  | **BAG per year** | **1.055 [1.032-1.079]** | **8.570e-06***** |
| **Sleep disorder** | Q2 vs Q1 | 1.092 [0.868-1.374] | 0.580 |
|  | Q3 vs Q1 | 1.283 [1.027-1.603] | 0.070 |
|  | **Q4 vs Q1** | **1.612 [1.295-2.005]** | **7.368e-05***** |

**Supplementary Table 16. Follow-up Characteristics of the Cohort**

| **Parameter** | **Value** |
| --- | --- |
| Total participants | 38,967 |
| Deaths (%) | 469 (1.2%) |
| Censored (%) | 38,498 (98.8%) |
| Median follow-up (IQR) | 3.4 years (1.8-5.1) |
| Total person-years | 148,774 |
| Follow-up range | 0-7.5 years |

**Supplementary Table 17. Censoring Distribution Across BAG Quartiles of Death**

| **BAG Quartile** | **Total** | **Deaths** | **Censored** | **Death Rate (%)** | **Censoring Rate (%)** |
| --- | --- | --- | --- | --- | --- |
| Q1 | 9,740 | 77 | 9,663 | 0.8 | 99.2 |
| Q2 | 9,740 | 91 | 9,649 | 0.9 | 99.1 |
| Q3 | 9,740 | 121 | 9,619 | 1.2 | 98.8 |
| Q4 | 9,741 | 180 | 9,561 | 1.8 | 98.2 |

| **Supplementary Table 18. Proportional Hazards Assumption Testing** | | | |
| --- | --- | --- | --- |
| **Covariate** | **χ²** | **df** | **p-value** |
| Age | 0.078 | 1 | 0.78 |
| Sex | 0.159 | 1 | 0.69 |
| BMI | 0.12 | 1 | 0.73 |
| Smoking status | 0.09 | 1 | 0.76 |
| Alcohol consumption | 0.14 | 1 | 0.71 |
| **Global test** | 0.26 | 5 | 0.88 |

*Statistical significance was evaluated using Schoenfeld residuals test. All covariates satisfied the proportional hazards assumption (p > 0.05).*

**Supplementary Table 19. Distribution of Lifestyle Behavior Scores Across BAG Groups: Comparative Analysis of Risk and Protective Factors (Total N=35,687)**

| **Variable** | **BAG** | **No (mean ± sd, n)** | **Yes (mean ± sd, n)** | **P-value** |
| --- | --- | --- | --- | --- |
| Never Smoking | Q1 | -3.77 ± 1.50 (n=3082) | -3.80 ± 1.53 (n=3082) | 0.43 |
|  | Q2 | -0.87 ± 0.58 (n=3432) | -0.89 ± 0.59 (n=3432) | **0.042*** |
|  | Q3 | 1.15 ± 0.61 (n=3683) | 1.12 ± 0.61 (n=3683) | **0.040*** |
|  | Q4 | 4.27 ± 1.69 (n=4172) | 4.16 ± 1.65 (n=4172) | **0.002**** |
| Low-to-Moderate Sedentary Behavior | Q1 | -3.77 ± 1.55 (n=2433) | -3.80 ± 1.51 (n=2433) | **0.046*** |
|  | Q2 | -0.88 ± 0.59 (n=2432) | -0.88 ± 0.59 (n=2432) | 0.95 |
|  | Q3 | 1.14 ± 0.60 (n=2582) | 1.13 ± 0.61 (n=2582) | 0.56 |
|  | Q4 | 4.22 ± 1.66 (n=2676) | 4.20 ± 1.67 (n=2676) | 0.35 |
| Frequent Social Connection | Q1 | -3.72 ± 1.51 (n=1134) | -3.80 ± 1.52 (n=1134) | 0.06 |
|  | Q2 | -0.88 ± 0.59 (n=1127) | -0.89 ± 0.59 (n=1127) | 0.75 |
|  | Q3 | 1.15 ± 0.62 (n=1097) | 1.13 ± 0.61 (n=1097) | 0.32 |
|  | Q4 | 4.24 ± 1.70 (n=1164) | 4.20 ± 1.67 (n=1164) | 0.66 |
| Healthy Sleep | Q1 | -3.72 ± 1.48 (n=1932) | -3.81 ± 1.53 (n=1932) | **0.030*** |
|  | Q2 | -0.86 ± 0.58 (n=1924) | -0.89 ± 0.59 (n=1924) | **0.020*** |
|  | Q3 | 1.13 ± 0.60 (n=2082) | 1.14 ± 0.61 (n=2082) | 0.67 |
|  | Q4 | 4.25 ± 1.71 (n=2140) | 4.20 ± 1.66 (n=2140) | 0.35 |
| Regular Physical Activity | Q1 | -3.77 ± 1.50 (n=1744) | -3.80 ± 1.52 (n=1744) | 0.62 |
|  | Q2 | -0.90 ± 0.59 (n=1635) | -0.88 ± 0.59 (n=1635) | 0.36 |
|  | Q3 | 1.13 ± 0.61 (n=1595) | 1.14 ± 0.61 (n=1595) | 0.58 |
|  | Q4 | 4.32 ± 1.77 (n=1701) | 4.18 ± 1.64 (n=1701) | **0.030*** |
| Moderate Alcohol Consumption | Q1 | -3.70 ± 1.49 (n=2263) | -3.82 ± 1.53 (n=2263) | **<0.001***** |
|  | Q2 | -0.86 ± 0.58 (n=2488) | -0.89 ± 0.59 (n=2488) | **0.030*** |
|  | Q3 | 1.16 ± 0.61 (n=2787) | 1.13 ± 0.61 (n=2787) | **0.040*** |
|  | Q4 | 4.34 ± 1.75 (n=3175) | 4.14 ± 1.62 (n=3175) | **<0.001***** |
| Healthy Diet | Q1 | -3.77 ± 1.48 (n=3140) | -3.80 ± 1.54 (n=3140) | 0.77 |
|  | Q2 | -0.89 ± 0.59 (n=3194) | -0.88 ± 0.59 (n=3194) | 0.62 |
|  | Q3 | 1.13 ± 0.61 (n=3255) | 1.14 ± 0.61 (n=3255) | 0.41 |
|  | Q4 | 4.26 ± 1.73 (n=3281) | 4.18 ±1.63 (n=3281) | 0.27 |

*Data presented as mean ± standard deviation (sample size).* *Significance levels: *p<0.05, **p<0.01, ***p<0.001 (Between-group: Student's t-test (healthy vs. unhealthy)).* *Quartile interpretation: Q1 (lowest age correlation) to Q4 (highest age correlation).*

**Supplementary Table 20. Quantitative Stratification of Lifestyle Class Effects on BAG Quartile Groups**

| **BAG** | **Lifestyle class** | **Mean ± SD (N)** | **p-value** |
| --- | --- | --- | --- |
| Q1 | Unfavorable [0-1] | -3.88 ± 1.63 (24) | 0.180 |
|  | Intermediate [2-4] | -3.71 ± 1.47 (2502) |  |
|  | Favorable [5-7] | -3.82 ± 1.54 (7213) |  |
| Q2 | Unfavorable [0-1] | -0.56 ± 0.52 (26) | 0.013* |
|  | Intermediate [2-4] | -0.88 ± 0.59 (2738) |  |
|  | Favorable [5-7] | -0.89 ± 0.59 (6976) |  |
| Q3 | Unfavorable [0-1] | 1.27 ± 0.62 (49) | 0.012* |
|  | Intermediate [2-4] | 1.14 ± 0.61 (2882) |  |
|  | Favorable [5-7] | 1.13 ± 0.61 (6809) |  |
| Q4 | Unfavorable [0-1] | 4.50 ± 1.81 (87) | <0.001*** |
|  | Intermediate [2-4] | 4.33 ± 1.76 (3289) |  |
|  | Favorable [5-7] | 4.15 ± 1.63 (6363) |  |

*Data presented as mean ± standard deviation (sample size).* *Significance levels: *p<0.05, **p<0.01, ***p<0.001 (Kruskal-Wallis test with Dunn's post-hoc adjustment).* *Quartile interpretation: Q1 (lowest age correlation) to Q4 (highest age correlation).*

**Supplementary figure**

**
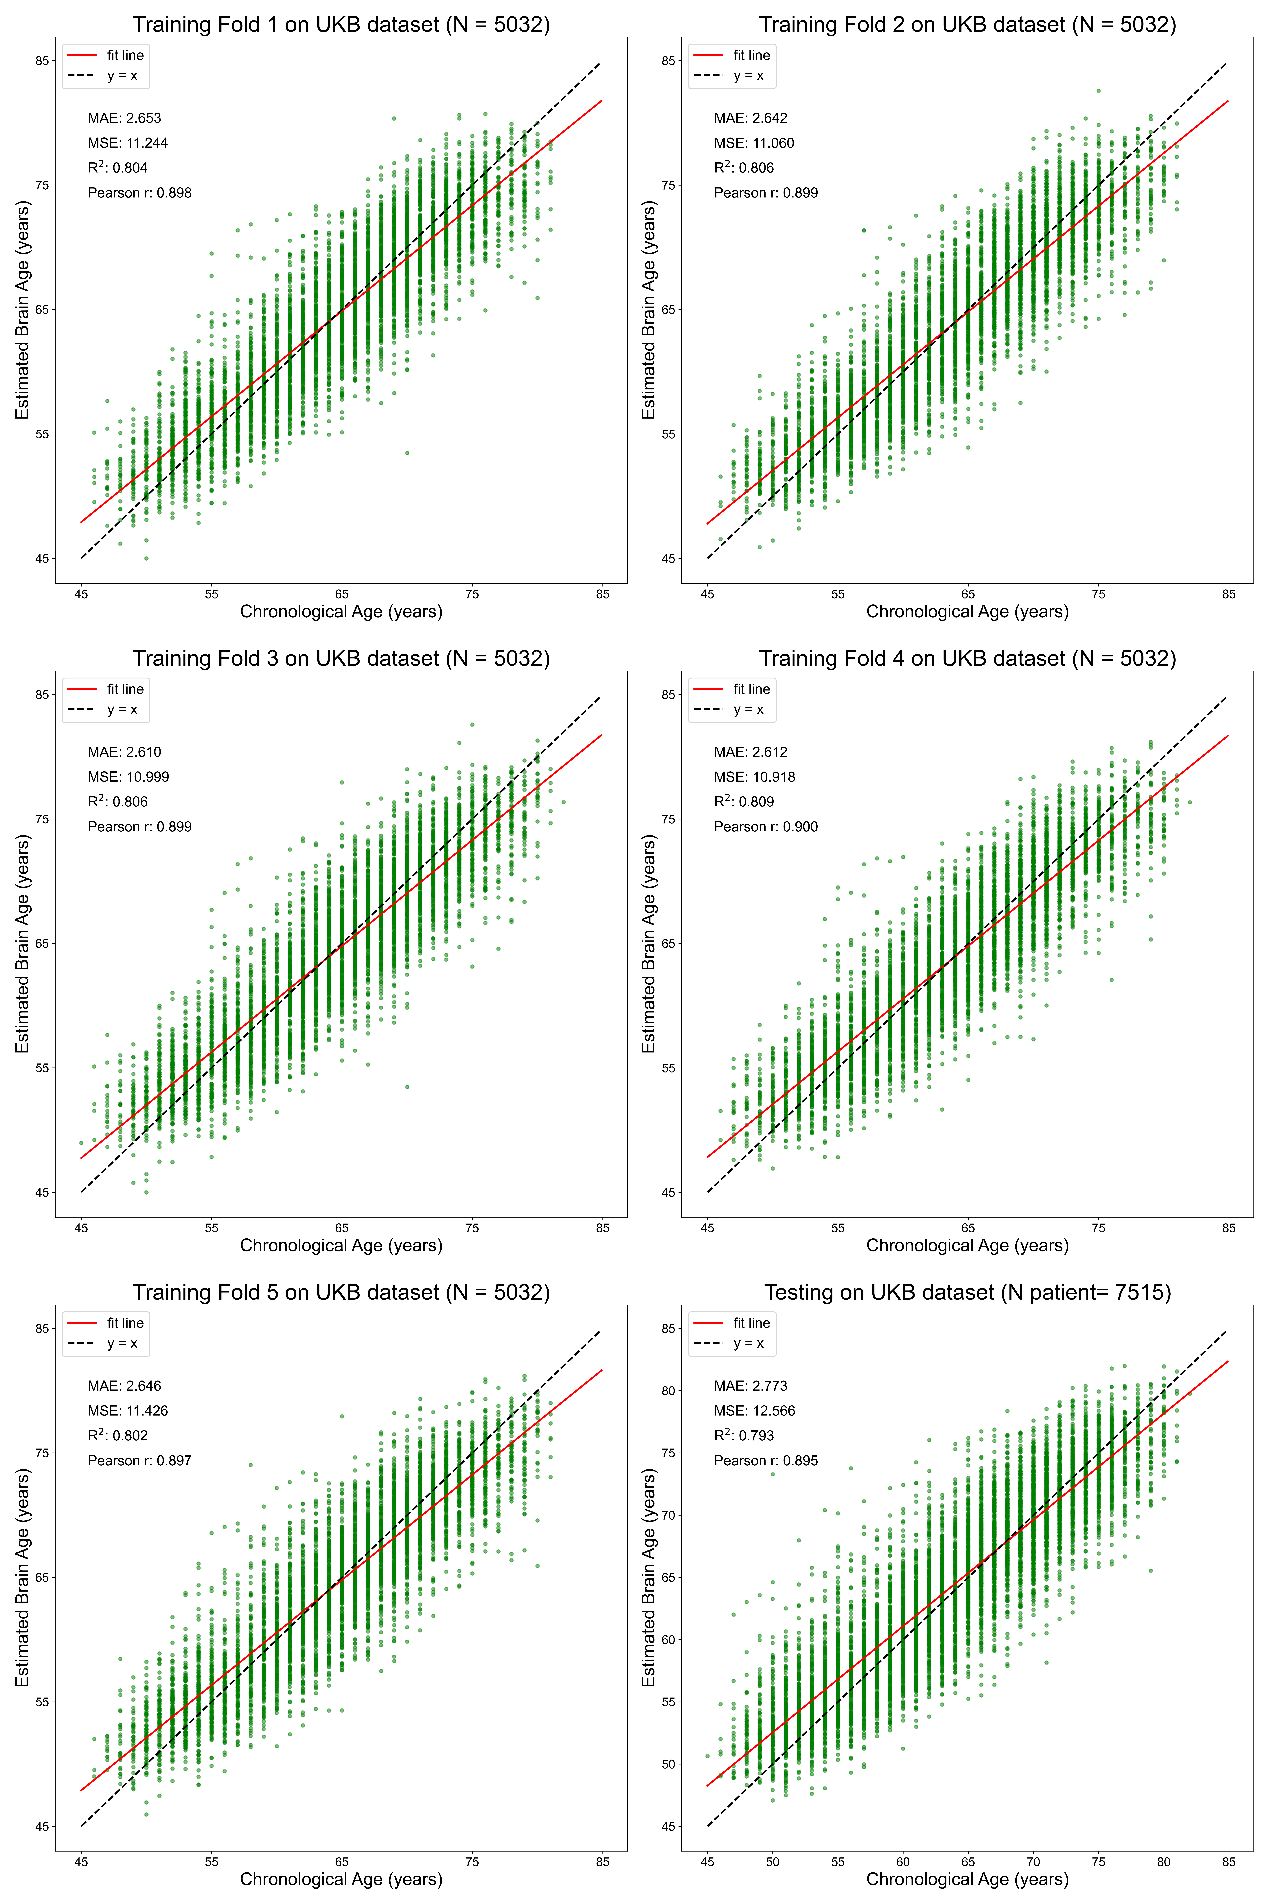
**

**Supplementary figure 1**. Brain age estimation on each fold across the 5-fold cross validation from the UK Biobank. Brain age estimation on the testing data of 7,515 subjects with brain disorders in the UKB dataset.


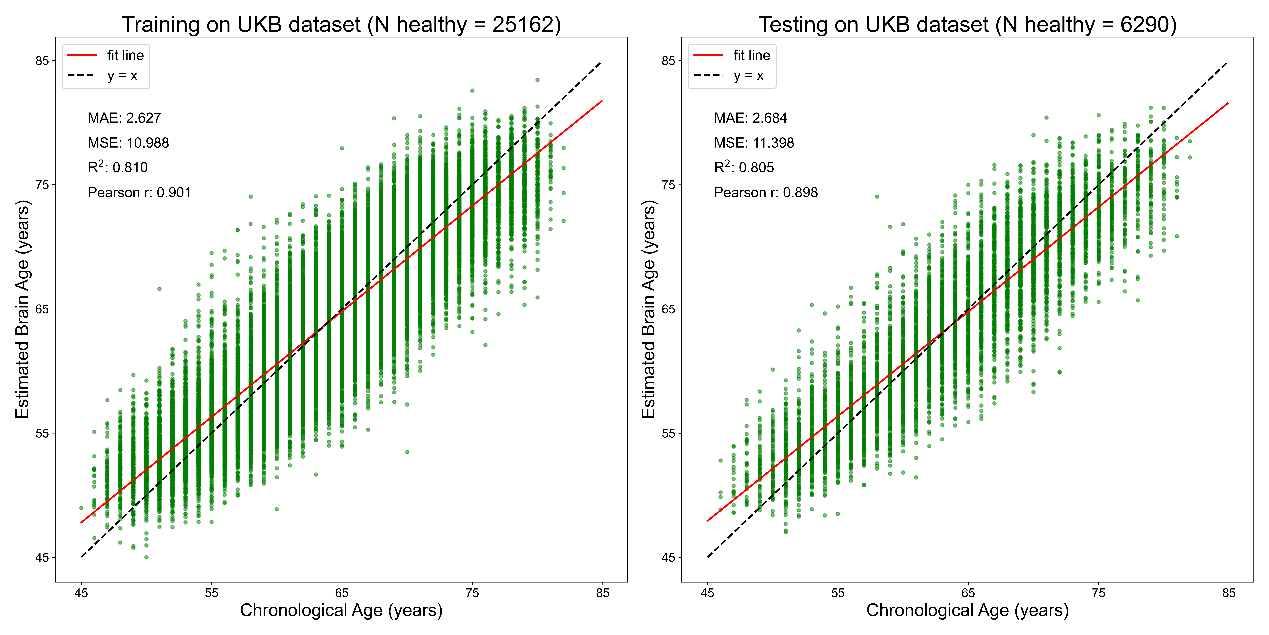


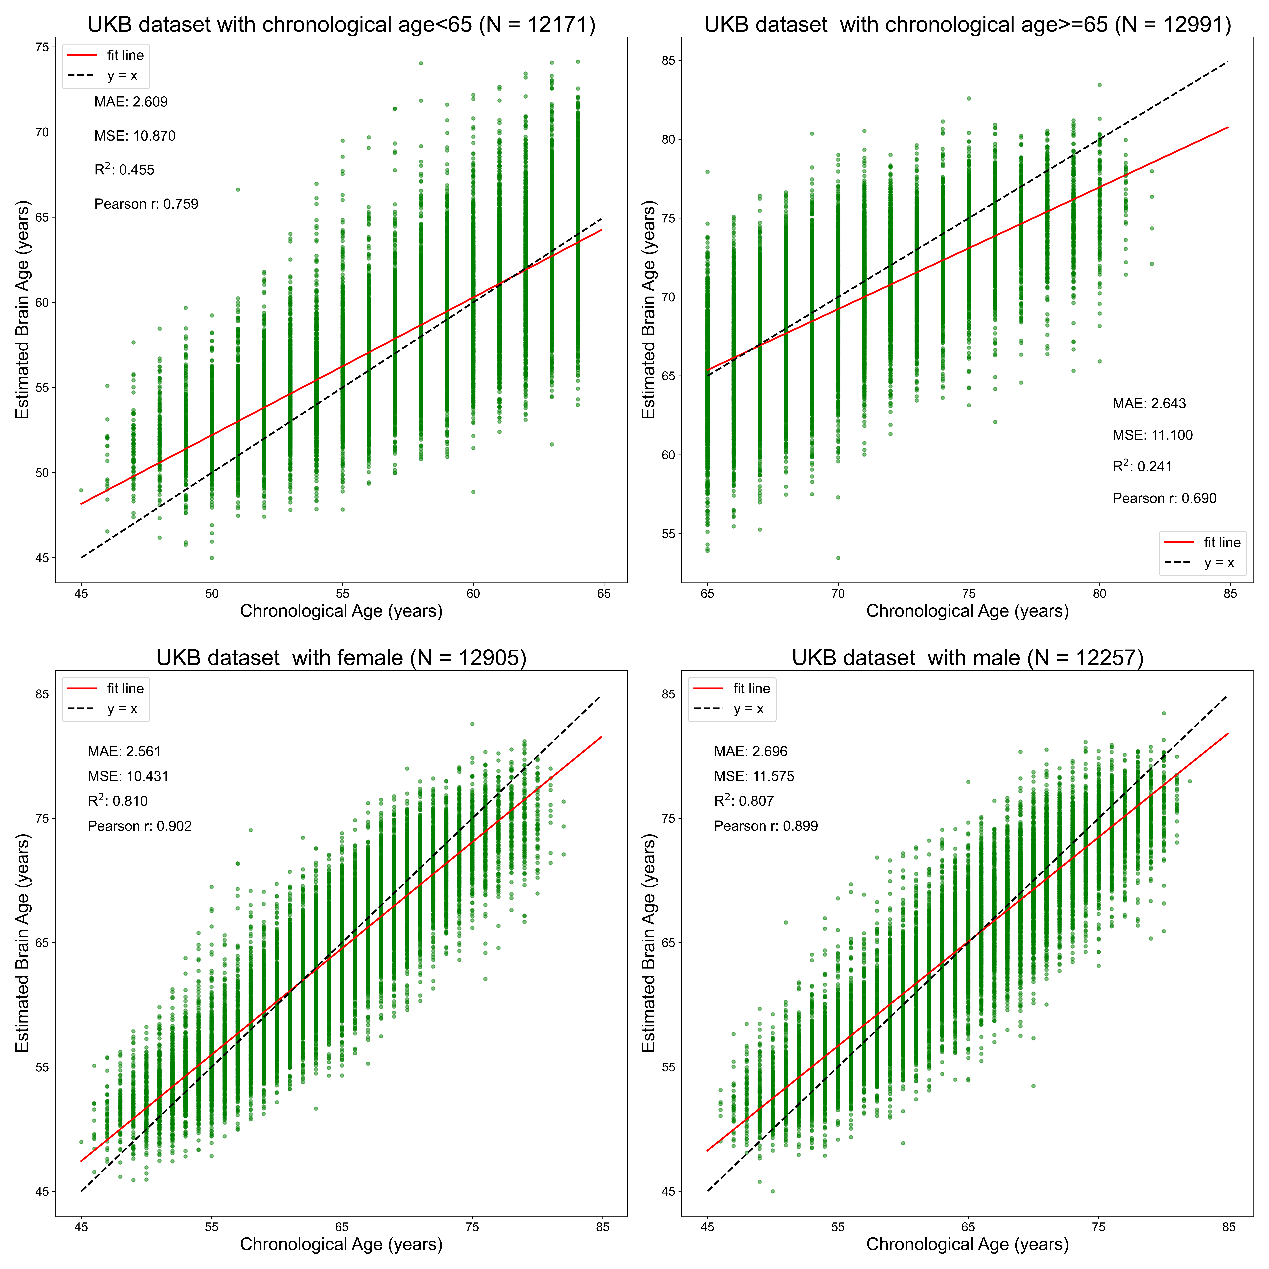


**Supplementary Figure 2. Brain age estimation based on sex-separated training and testing datasets in the UKB dataset.**


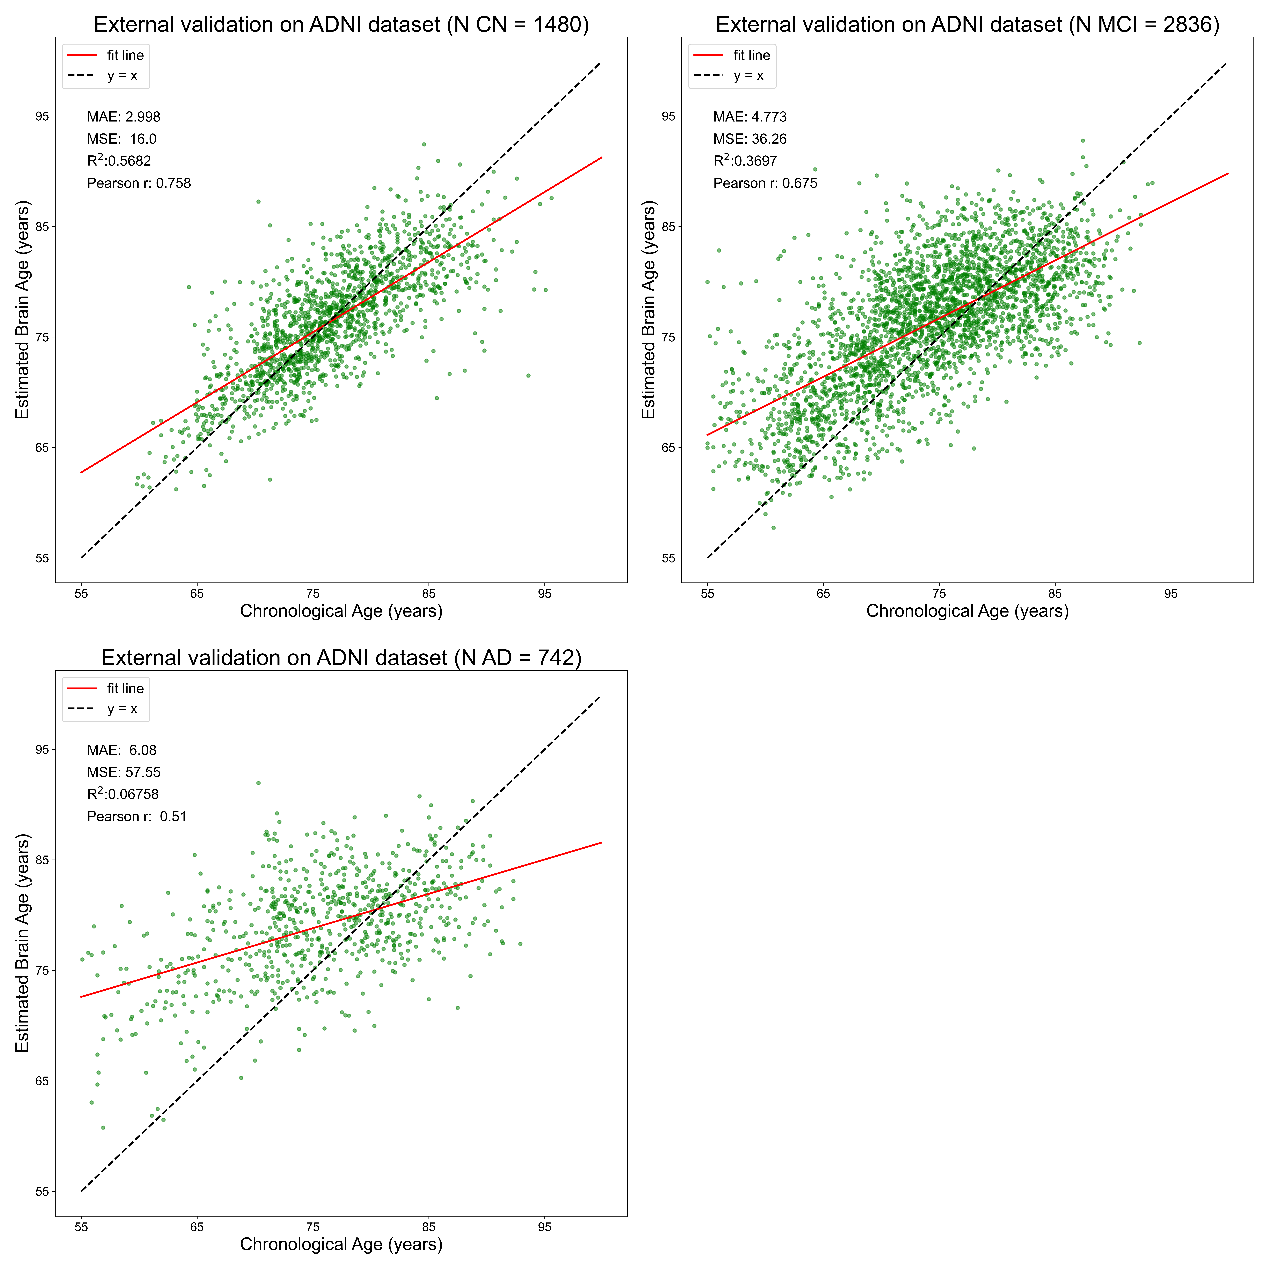


**Supplementary Figure 3 Brain age estimation on the ADNI dataset. CN, cognitively normal; MCI, mild cognitive impairment; AD, Alzheimer’s disease.**

**
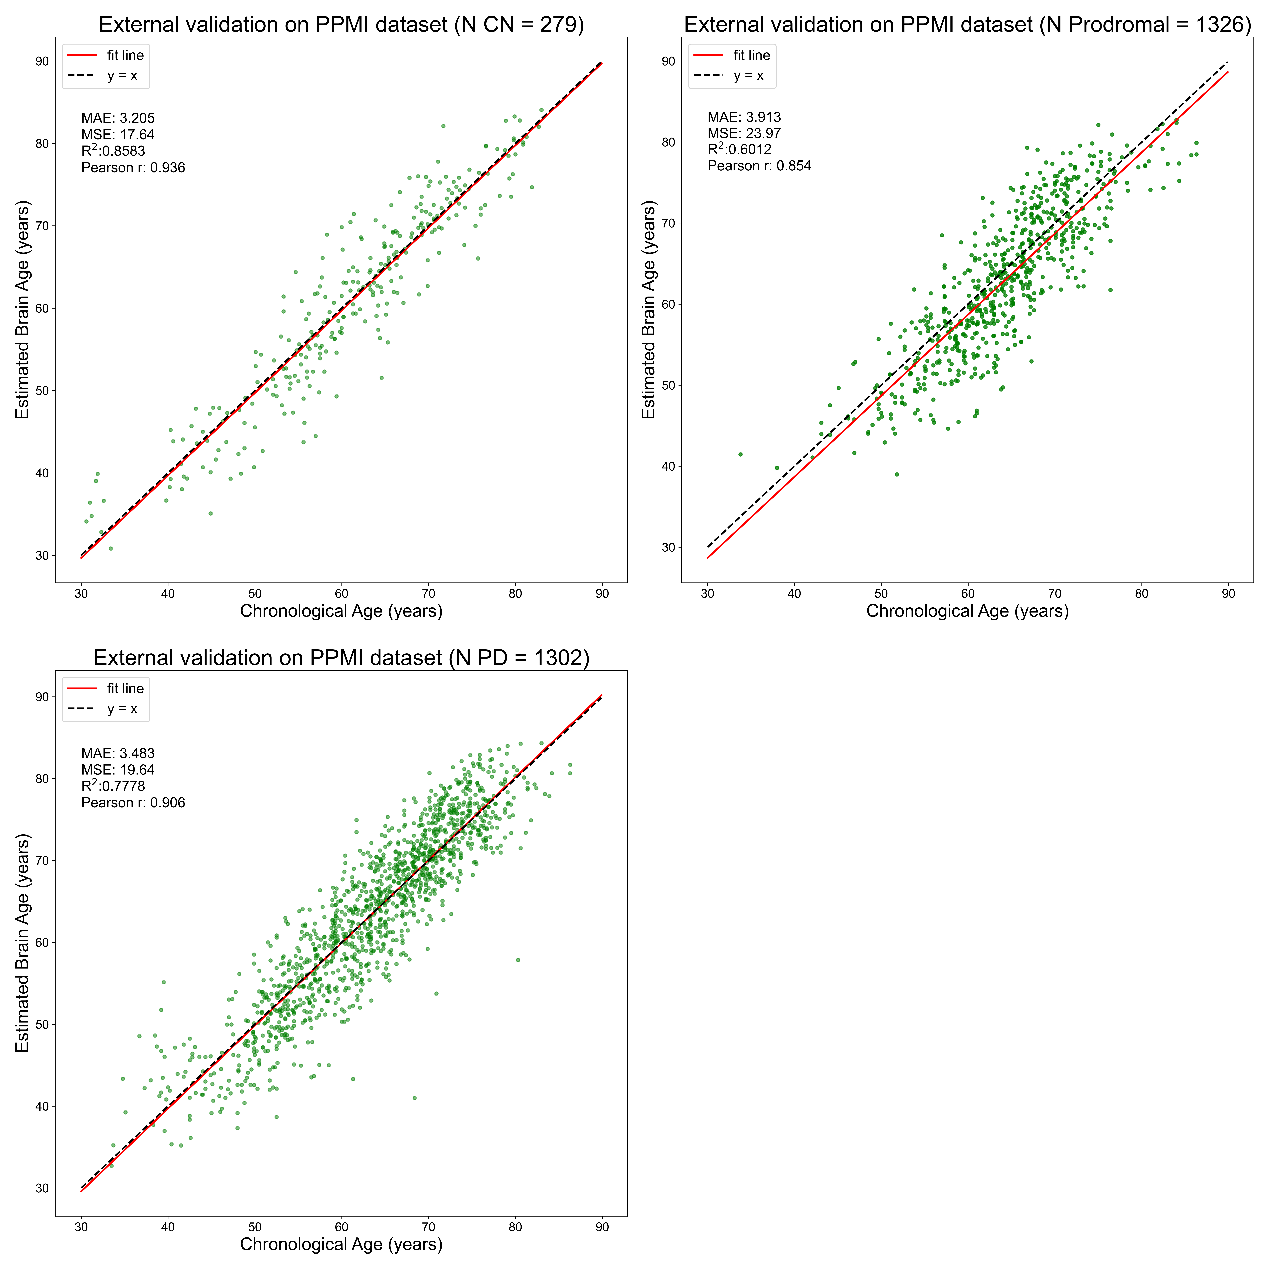
**

# **Supplementary Figure 4 Brain age estimation on the PPMI dataset. HC, healthy control; PD, Parkinson’s disease.**

**
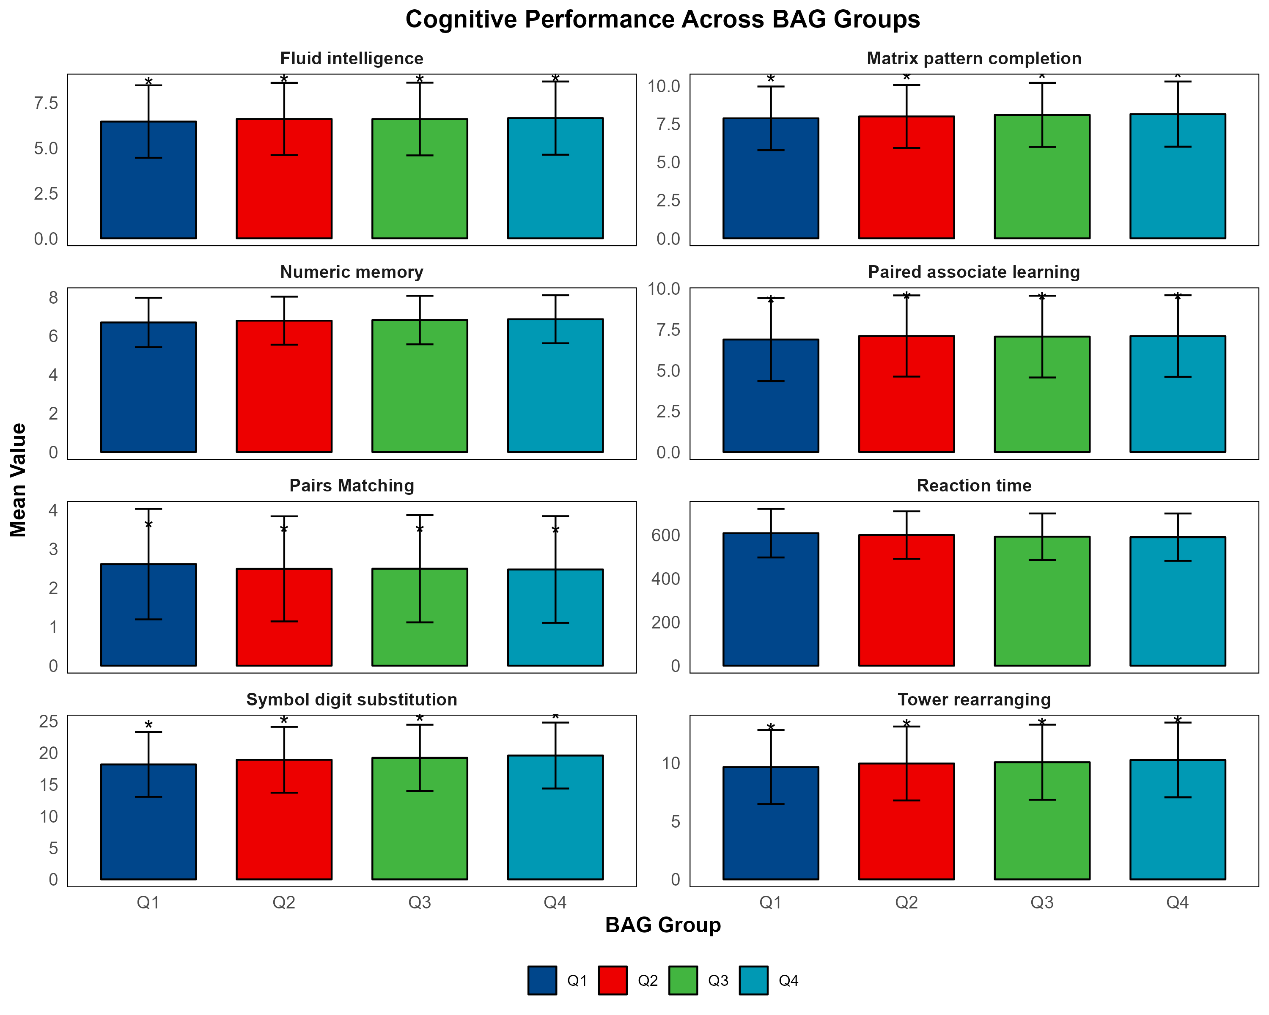
**

**Supplementary Figure 5. Cognitive Performance Stratified by Brain Age Gap Quartiles in the UK Biobank Cohort**

**
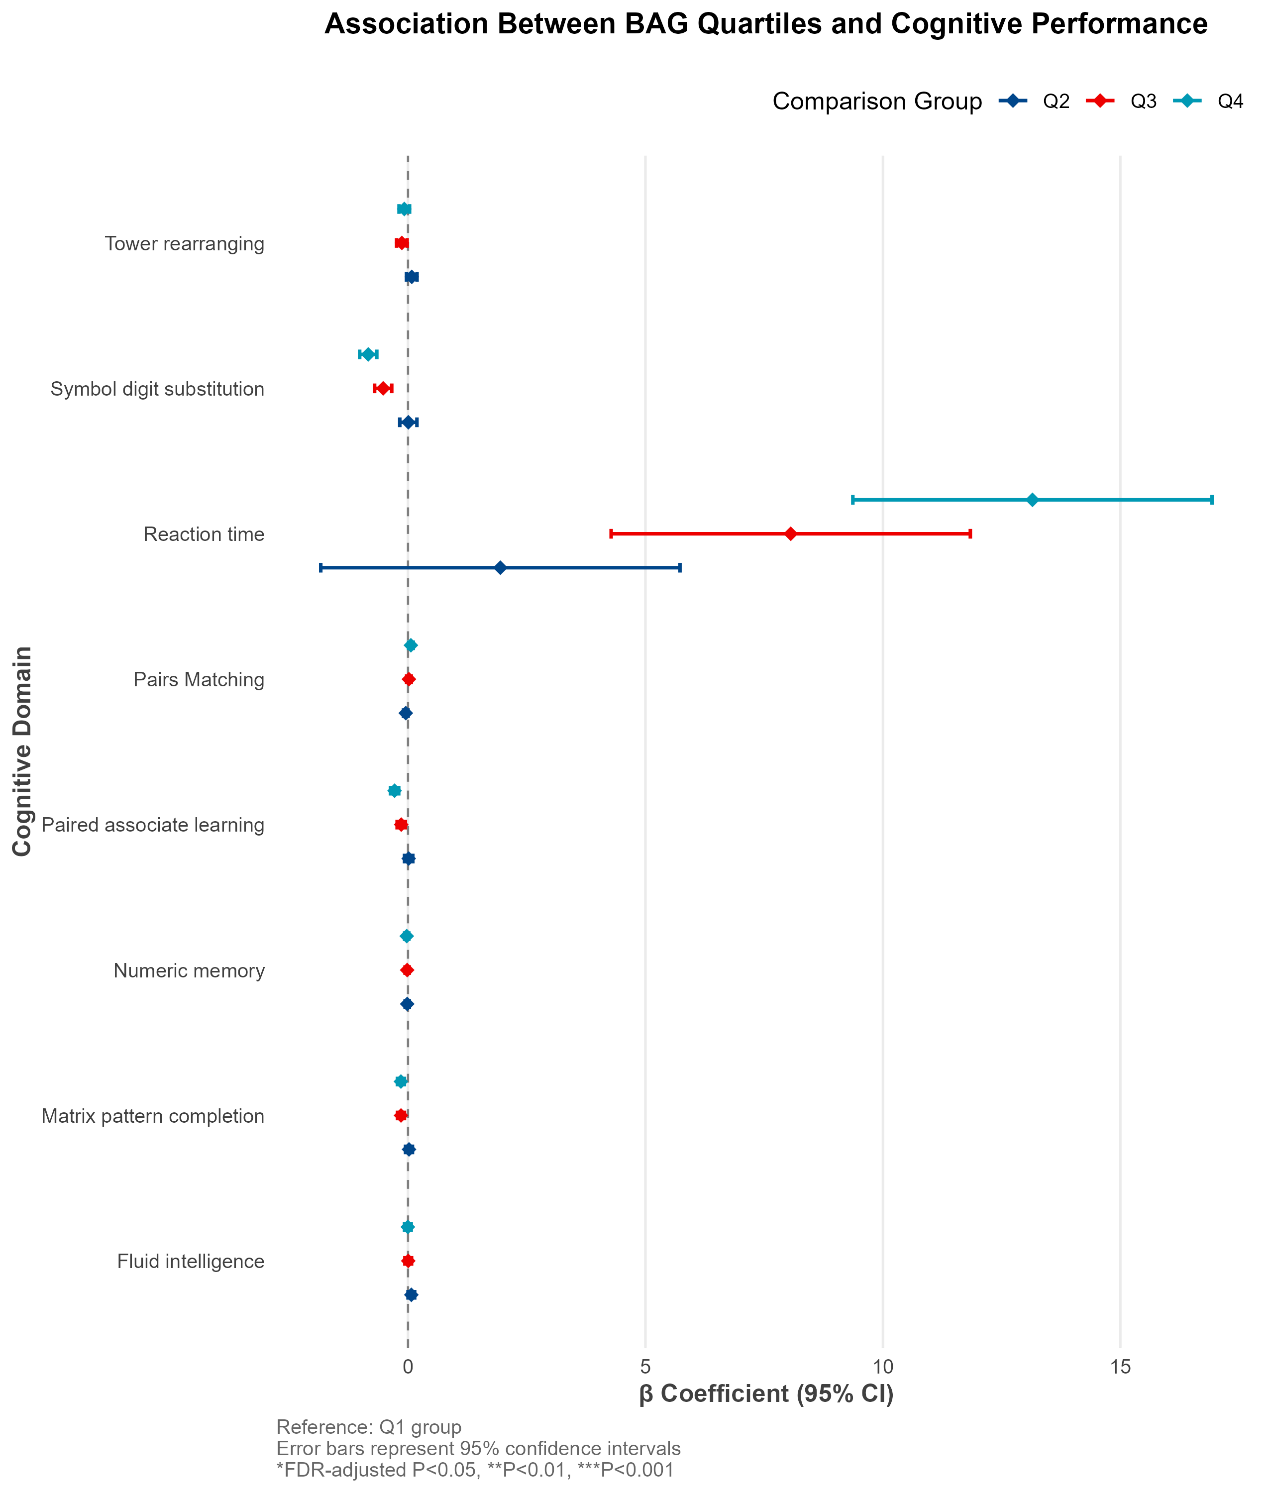
**

**Supplementary Figure 6. Dose-Response Gradient of Biological Aging Quartiles on Cognitive Domain Performance**


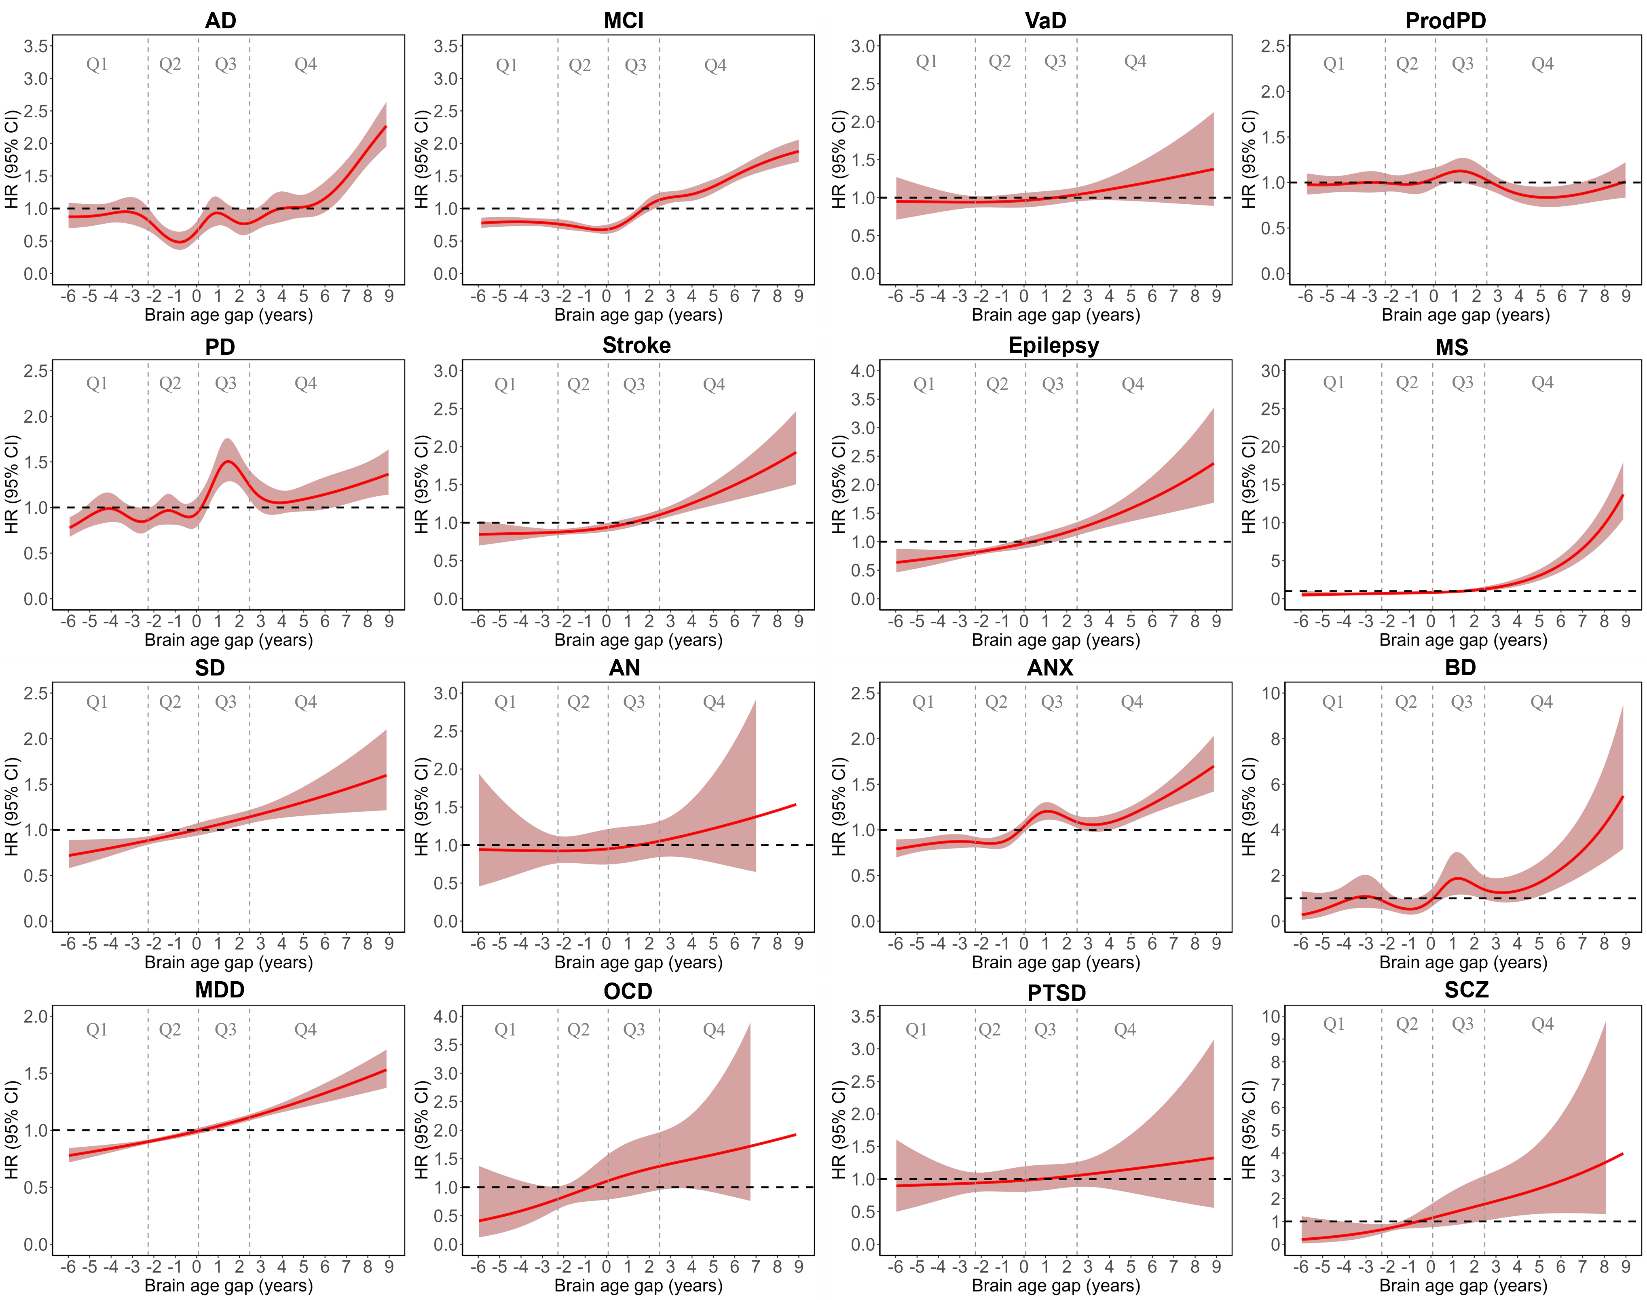
**Supplementary Figure 7.** Hazard Ratios (HR) for Various Brain Disorders Across BAG Quartiles
